# Supplementary material for: Human MLH1 suppresses the insertion of telomeric sequences at intra-chromosomal sites in telomerase-expressing cells
Source: PubMed Central journal article supplement — Nucleic Acids Res. 2016 Nov 28;45(3):1219–32. doi: 10.1093/nar/gkw1170 (PMC5388398; doi:10.1093/nar/gkw1170), 2016-11-28
Supplement: gkw1170_Supp.pdf [file gkw1170_Supp.pdf]

Figure S1. Jia et al.

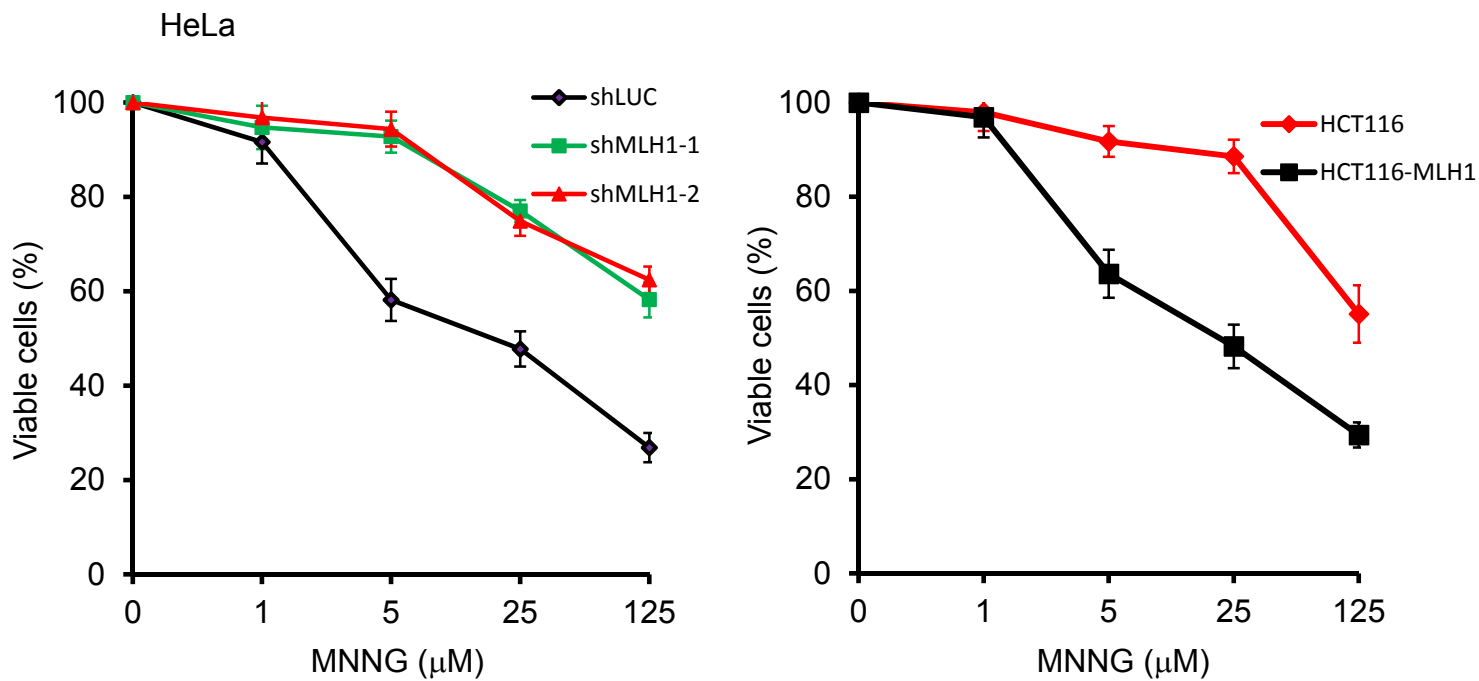

**Figure S1. MLH1 deficient cells are resistant to the cytotoxic effect of MNNG.** HeLa with MLH1 knockdown and MLH1-deficient HCT116 cells were treated with indicated concentrations of MNNG. Cell viability were measured by the MTT assay.

Figure S2. Jia et al.

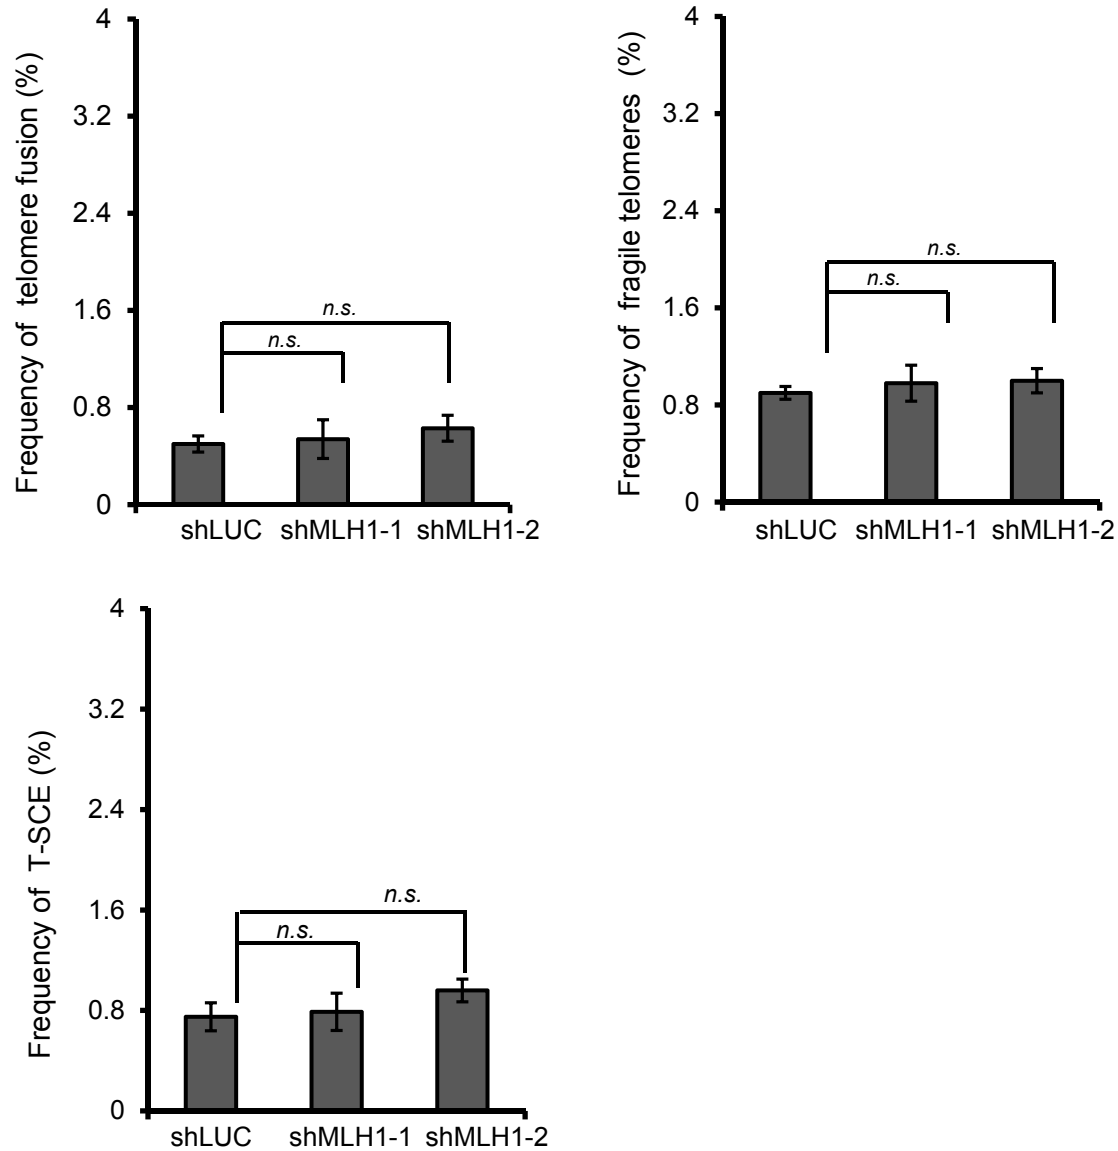

**Figure S2. MLH1 deficiency does not induce telomere abnormalities.** Metaphase chromosomes from HeLa MLH1 knockdown cells were hybridized by telomeric probe. In each experiment, >1,500 chromosomes from each sample were analyzed and each experiment was repeated with three independent replicates. Error bars: SEM.

Figure S3. Jia et al.

A

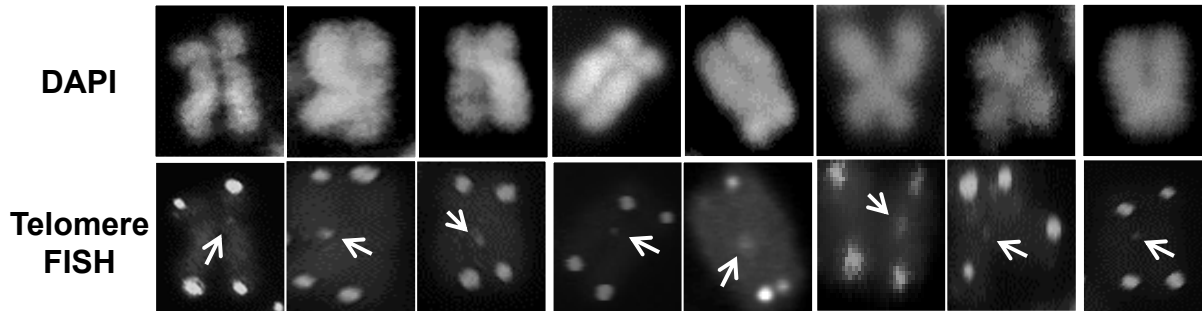

B

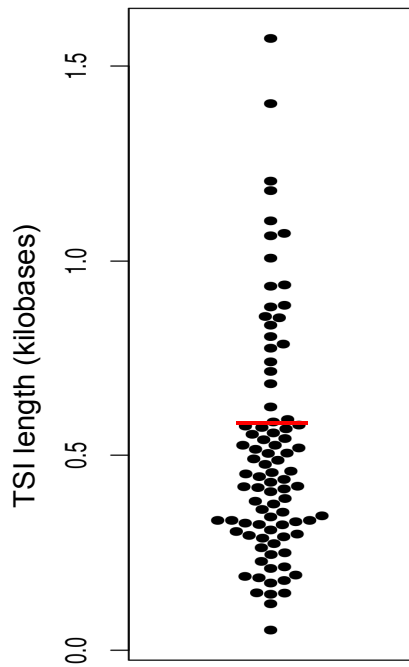

**Figure S3. (A) The majority of TSI signals are weakly stained.** Metaphase chromosomes from HCT116 cells were hybridized with telomeric probe. Eight randomly selected FISH images are shown. White arrows point to inserted telomeric sequences at intra-chromosomal loci. **(B) Calculated TSI length using Q-FISH.** Fluorescent intensity of individual TSIs ( $N_{\text{TSI}} = 89$ ) were measured from HCT116 metaphase chromosomes. Red bar indicates the mean TSI length (578 bp).

Figure S4. Jia et al.

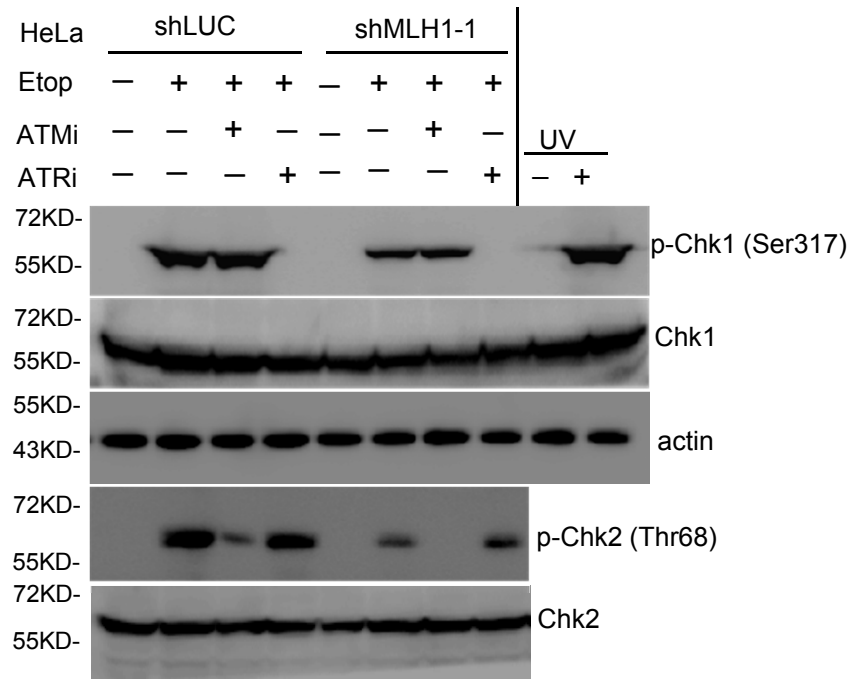

**Figure S4. ATMi or ATRi abolishes ATM or ATR activation as measured by Chk1 or Chk2 phosphorylation.** Immunoblot analysis of Chk1 and Chk2 phosphorylation in HeLa-shLUC and HeLa-shMLH1 cells. Cells were treated with ATM inhibitor (ATMi, 10  $\mu$ M) or ATR inhibitor (ATRi, 10  $\mu$ M) along with etoposide (3  $\mu$ M). p-Chk1 (Ser317), Chk1, p-Chk2 (Thr68), Chk2 were detected by immunoblot. Untreated (UV-) and UV treated (UV+) plain HeLa cells were used as negative and positive controls for Chk1 phosphorylation.

Figure S5. Jia et al.

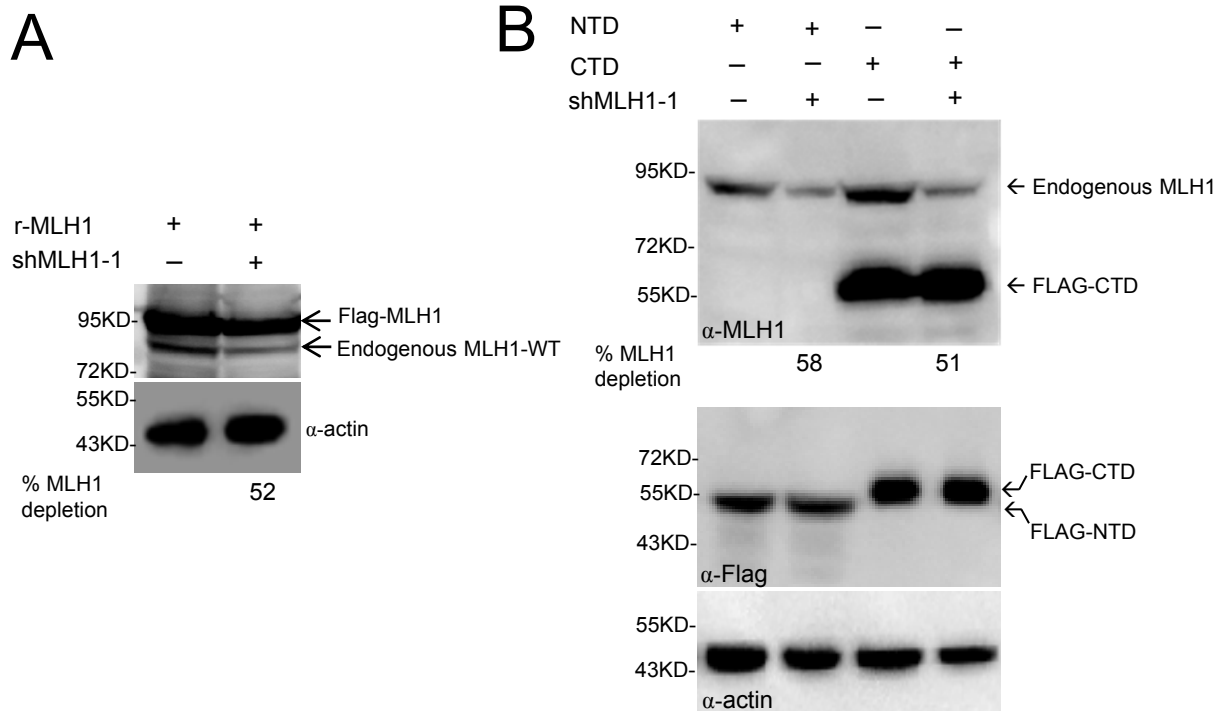

**Figure S5. Immunoblot of endogenous MLH1 knockdown in cells expressing FLAG-MLH1 and MLH1 mutants. (A)** Detection of knockdown of endogenous MLH1 in HeLa cells concurrently expressing shMLH1 and RNAi-resistant full-length FLAG-MLH1 (r-MLH1) with the MLH1 antibody. **(B)** Detection of knockdown of endogenous MLH1 in HeLa cells concurrently expressing shMLH1 and RNAi-resistant FLAG-NTD (2-389aa) or FLAG-CTD (390aa-756aa). Top panel: Immunoblot with anti-MLH1 antibody. Since the MLH1 antibody was produced by immunizing animals with truncated MLH1 protein (aa 381-483), it can only recognize CTD but not NTD. Middle panel: The expression of NTD and CTD was detected with the anti-FLAG antibody.

Figure S6. Jia et al.

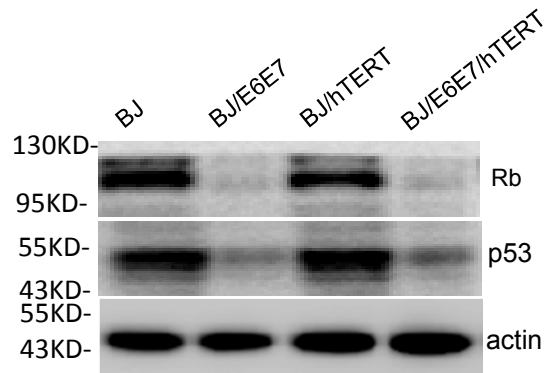

**Figure S6. Expression of p53 and retinoblastoma (Rb) is repressed by E6 and E7.** Immunoblot of p53 and Rb expression in BJ, BJ/hTERT, and corresponding cells expressing HPV E6 and E7 proteins.

Figure S7. Jia et al.

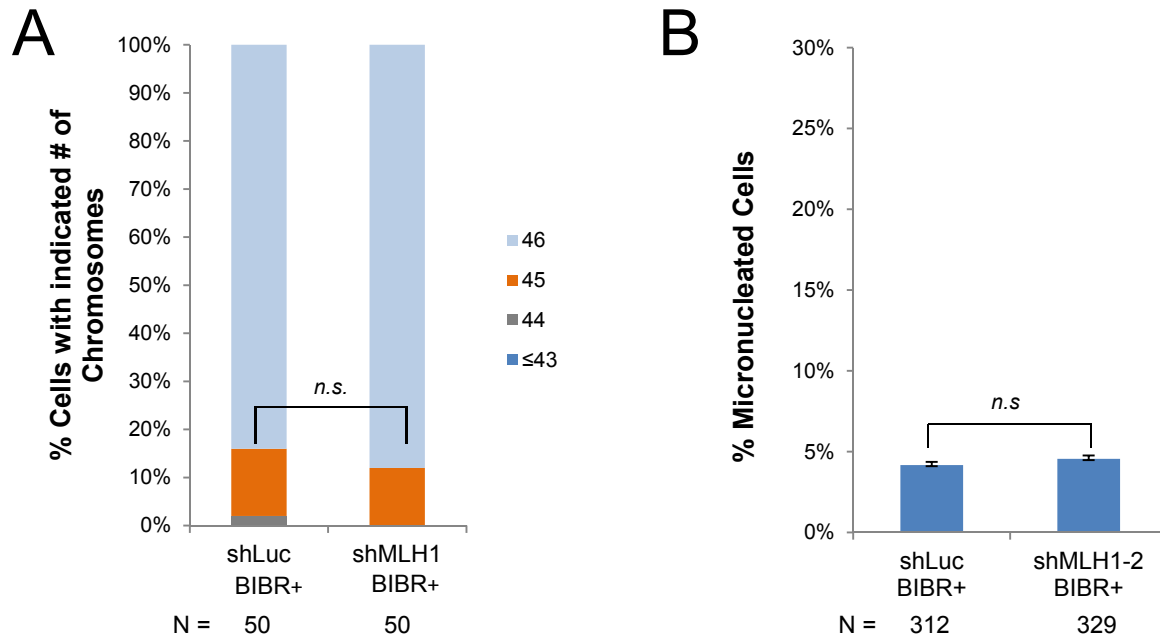

**Figure S7.** Chromosome loss and micronuclei formation are not induced by MLH1 deficiency in telomerase-negative cells. BJ/hTERT cells were treated with telomerase inhibitor BIBR and then analyzed for chromosome loss and MN formation. **(A)** Percentage of chromosome loss. N denotes the number of metaphase spreads analyzed in each sample. Chromosome loss was evaluated using a binomial Z-Statistic to compare the proportion of intact metaphase spreads (spreads with 46 chromosomes). **(B)** Percentage of micronucleated cells. N denotes the number of interphase cells analyzed in each sample.

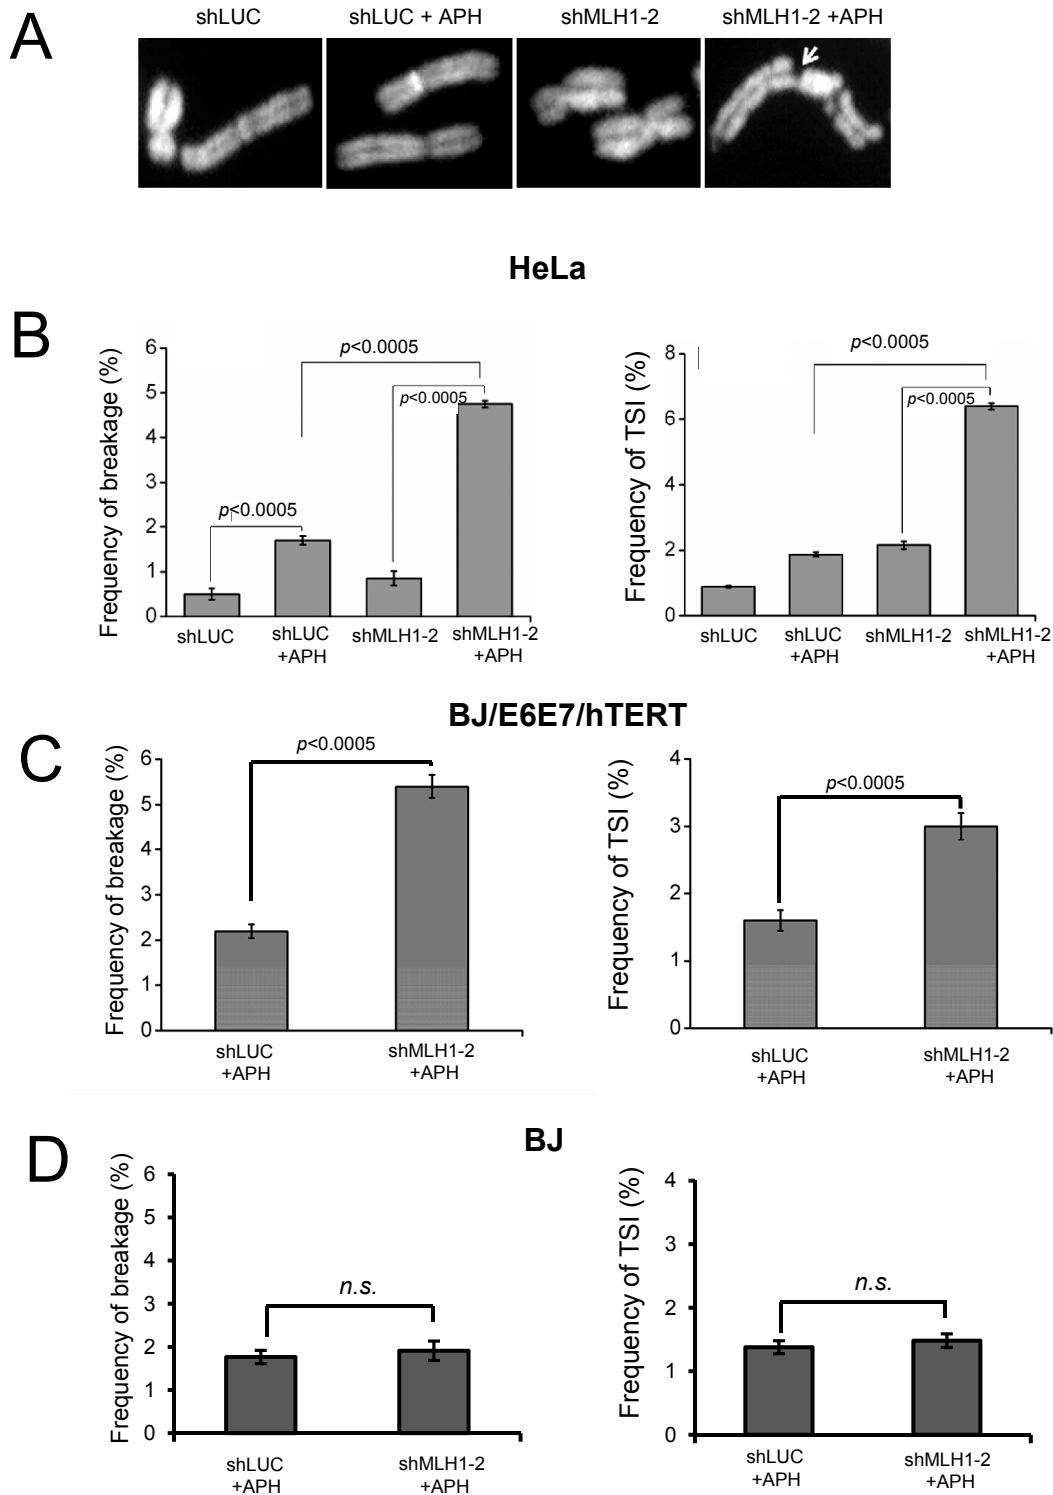

**Figure S8. Chromosome breakage induced by MLH1 deficiency under replication stress.** (A) Representative chromosomes in HeLa control and shMLH1 cells treated with or without APH (0.3  $\mu$ M, 24 hrs). The white arrow indicates chromosomal breakage. (B) Frequency of chromosome breakage and TSI in control HeLa and MLH1 knockdown cells following APH treatment. (C) Frequency of chromosome breakages and %TSI in BJ/E6E7/hTERT control and shMLH1 cells following APH treatment. (D) Frequency of chromosome breakages and %TSI in BJ control and shMLH1 cells following APH treatment. In each experiment, >1,500 chromosomes from each sample were analyzed and each experiment was repeated with three independent replicates. Error bars: SEM.
